# Supplementary material for: DNA replication timing during development anticipates transcriptional programs and parallels enhancer activation
Source: PubMed Central journal article supplement — Genome Res. 2017 Aug;27(8):1406–16. doi: 10.1101/gr.218602.116 (PMC5538556; doi:10.1101/gr.218602.116), 2017-08
Supplement: supp_gr.218602.116_Supplemental_Fig_S1.pdf [file supp_gr.218602.116_Supplemental_Fig_S1.pdf]

A

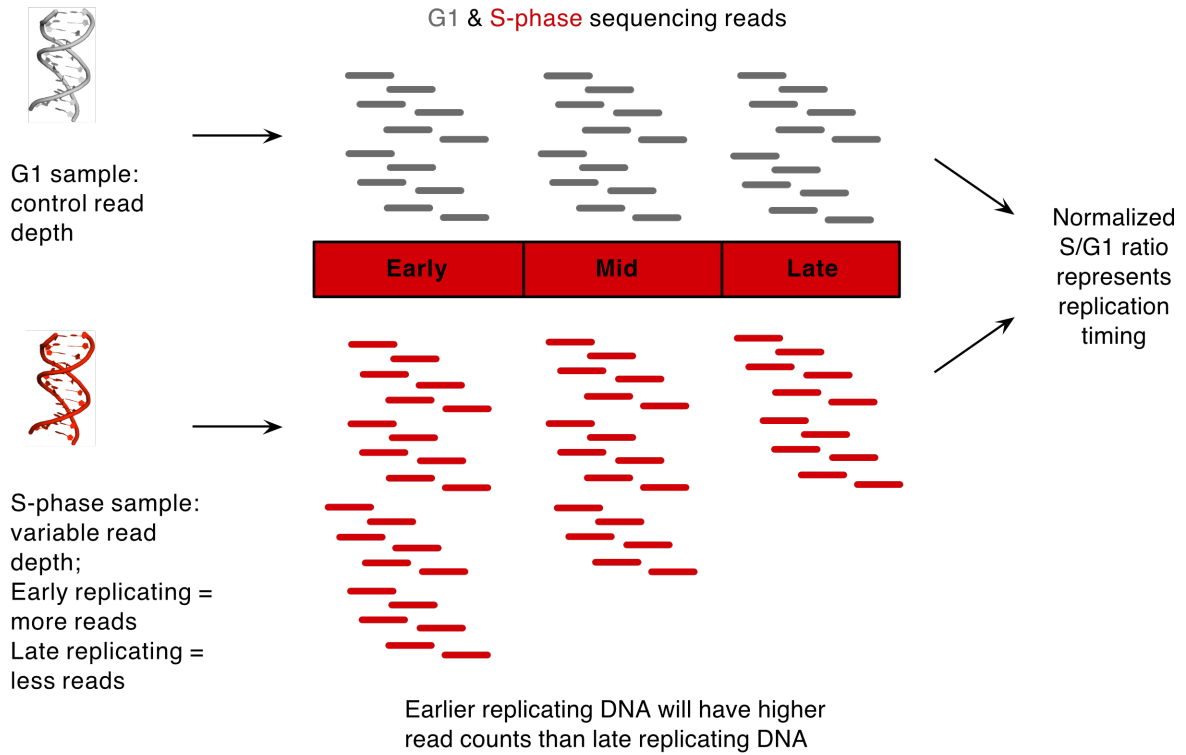

B

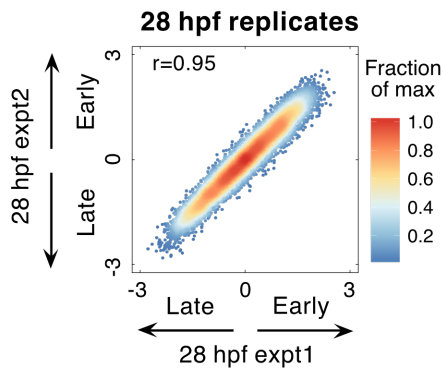

**Supplemental Fig S1.** DNA Replication Timing of the Zebrafish Genome, Related to Figure 1

(A) Method for determining replication timing. G1 sample is used to determine the reference 2N DNA copy number based on sequencing read depth. S-phase sample read depth is determined by counting sequencing reads in the same genomic regions as the G1 sample. Normalized DNA copy number difference (S/G1 ratio) represents replication timing

(B) Genome-wide Pearson's correlation between two experimental replicates of 28 hpf embryos ( $r=0.95$ ). Color bars represent fraction (percentage) of maximum density plotted
