# Supplementary material for: DNA replication timing during development anticipates transcriptional programs and parallels enhancer activation
Source: PubMed Central journal article supplement — Genome Res. 2017 Aug;27(8):1406–16. doi: 10.1101/gr.218602.116 (PMC5538556; doi:10.1101/gr.218602.116), 2017-08
Supplement: supp_gr.218602.116_Supplemental_Fig_S2.pdf [file supp_gr.218602.116_Supplemental_Fig_S2.pdf]

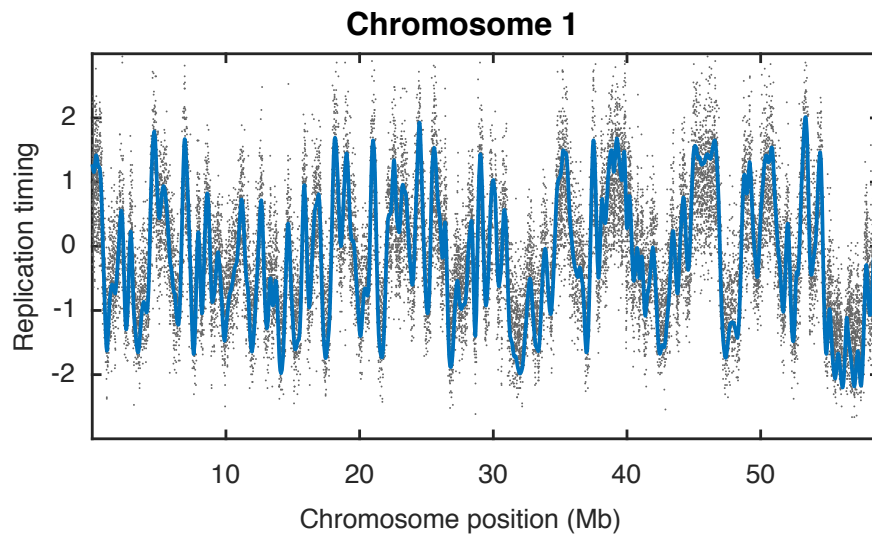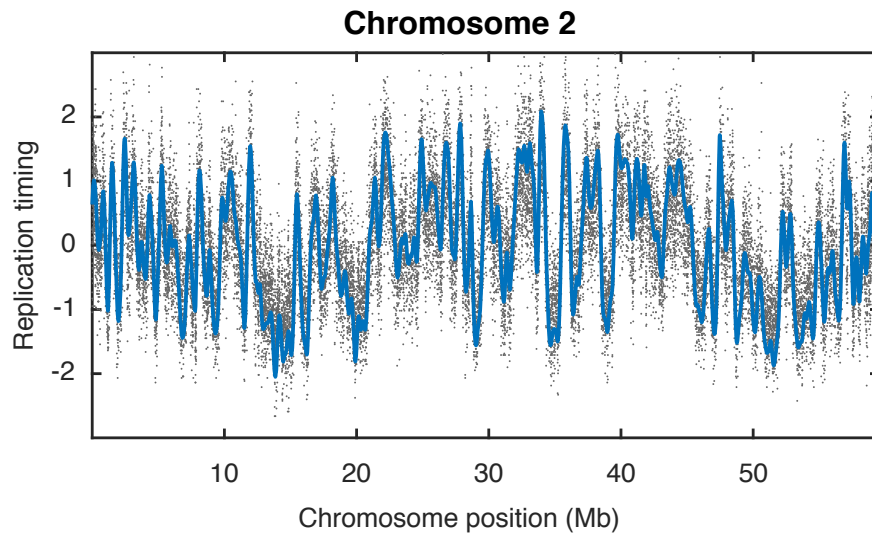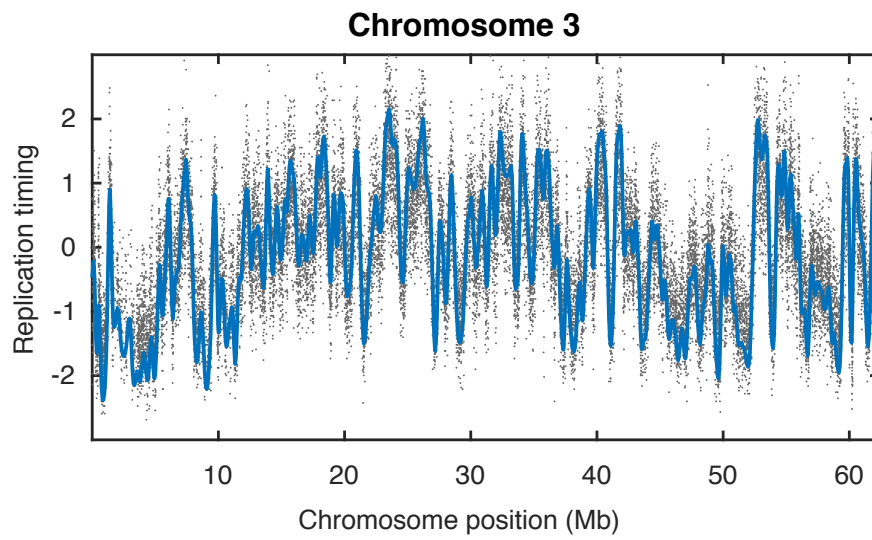

**Supplemental Fig S2.** Raw and Smoothed Replication Timing Data  
Raw (grey dots) and smoothed (blue lines) 28 hpf zebrafish replication timing data for Chromosomes 1, 2 and 3.
