# Supplementary material for: DNA replication timing during development anticipates transcriptional programs and parallels enhancer activation
Source: PubMed Central journal article supplement — Genome Res. 2017 Aug;27(8):1406–16. doi: 10.1101/gr.218602.116 (PMC5538556; doi:10.1101/gr.218602.116), 2017-08
Supplement: supp_gr.218602.116_Supplemental_Fig_S3.pdf [file supp_gr.218602.116_Supplemental_Fig_S3.pdf]

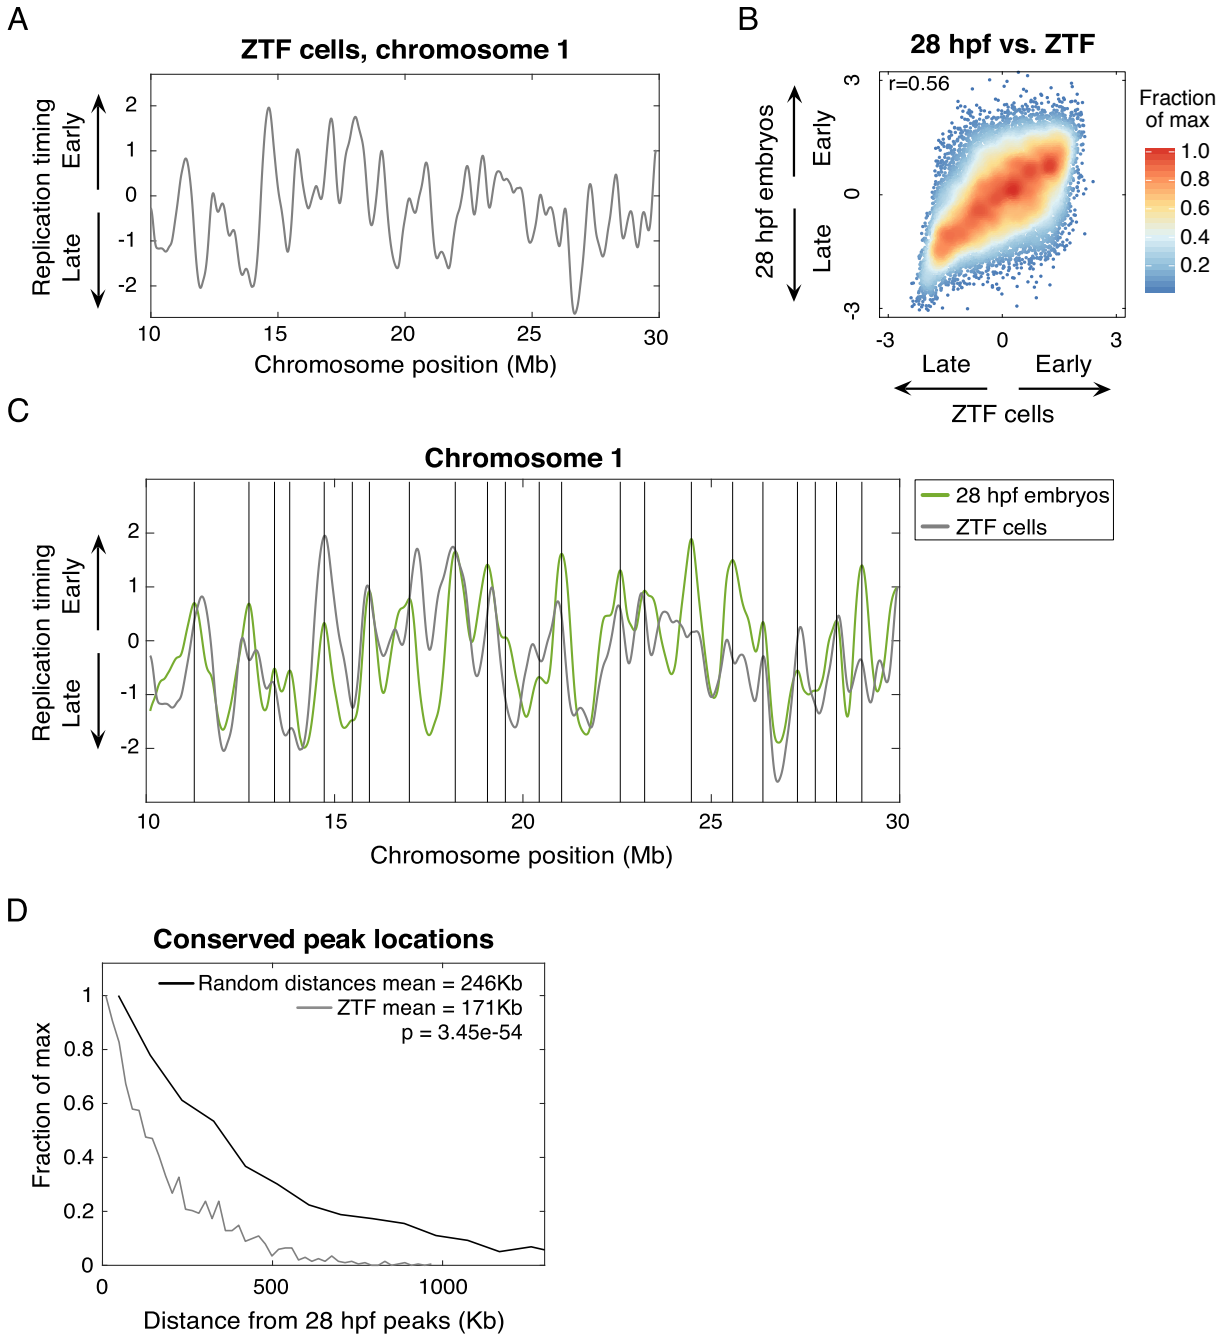

**Supplemental Fig S3. ZTF Cells Replication Timing Properties, Related to Figure 2**

(A) Replication timing of a 20Mb segment of Chromosome 1 from ZTF cells shows that sharp peaks and valleys with continuous fluctuations between early and late replication define the timing profile, similar to 28hpf embryos

(B) Genome-wide Pearson's correlation between 28 hpf embryos and ZTF cells. Color bars represent fraction (percentage) of maximum density plotted

(C) Replication timing profiles of a representative 20Mb of Chromosome 1 for 28hpf embryos (green) and ZTF cells (blue) with vertical lines indicating the position of peaks (origins or clusters of origins) in the 28hpf sample that are frequently conserved in ZTF cells

(D) Plotting the distance between peaks in the 28hpf embryos and ZTF cells (blue line) as compared to random distances from 28hpf peaks (grey line) indicates that peak locations are significantly conserved between different cell types in zebrafish. p-value from Kolmogorov-Smirnov test
