# Supplementary material for: DNA replication timing during development anticipates transcriptional programs and parallels enhancer activation
Source: PubMed Central journal article supplement — Genome Res. 2017 Aug;27(8):1406–16. doi: 10.1101/gr.218602.116 (PMC5538556; doi:10.1101/gr.218602.116), 2017-08
Supplement: supp_gr.218602.116_Supplemental_Fig_S4.pdf [file supp_gr.218602.116_Supplemental_Fig_S4.pdf]

A

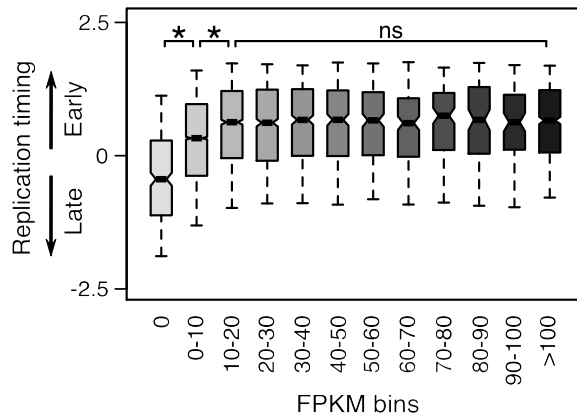

B

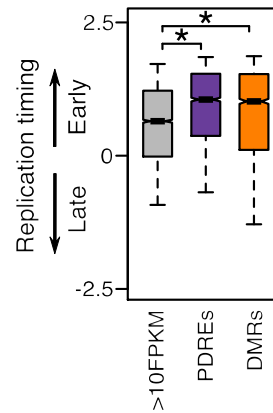

**Supplemental Fig S4.** Replication Timing of Enhancers and Genes of Various Expression Levels, Related to Figure 3. (A) Replication timing of genes in twelve categories based on RNA-seq expression levels (FPKM bins). Non-detectable genes (0 FPKM) are late replicating. Genes expressed at low levels (1-10 FPKM) are significantly earlier replicating than non-detectable genes. Genes expressed at higher levels (10-20 FPKM) are significantly earlier replicating than low-level expressed genes. At expression levels above 10 FPKM, replication timing does not change significantly. \*  $p < 0.0001$ , ANOVA with post-hoc corrections, ns=all pairwise comparisons of FPKM bins above 0-10 not significant (Pauli et al., 2010) (B) The median replication timing of enhancers (PDREs and DMRs) is significantly earlier than highly expressed genes (>10 FPKM). \*  $p < 10^{-5}$ , t-tests with Bonferroni corrections (Bogdanovic et al., 2012, Pauli et al. 2012, Lee et al., 2015) FPKM = Fragments Per Kilobase of transcript per Million mapped reads. Box plots show the median (line), 95% confidence interval (notch), 25-75th percentile (box), and 10-90th percentile (whiskers)
