# Supplementary material for: DNA replication timing during development anticipates transcriptional programs and parallels enhancer activation
Source: PubMed Central journal article supplement — Genome Res. 2017 Aug;27(8):1406–16. doi: 10.1101/gr.218602.116 (PMC5538556; doi:10.1101/gr.218602.116), 2017-08
Supplement: supp_gr.218602.116_Supplemental_Fig_S6.pdf [file supp_gr.218602.116_Supplemental_Fig_S6.pdf]

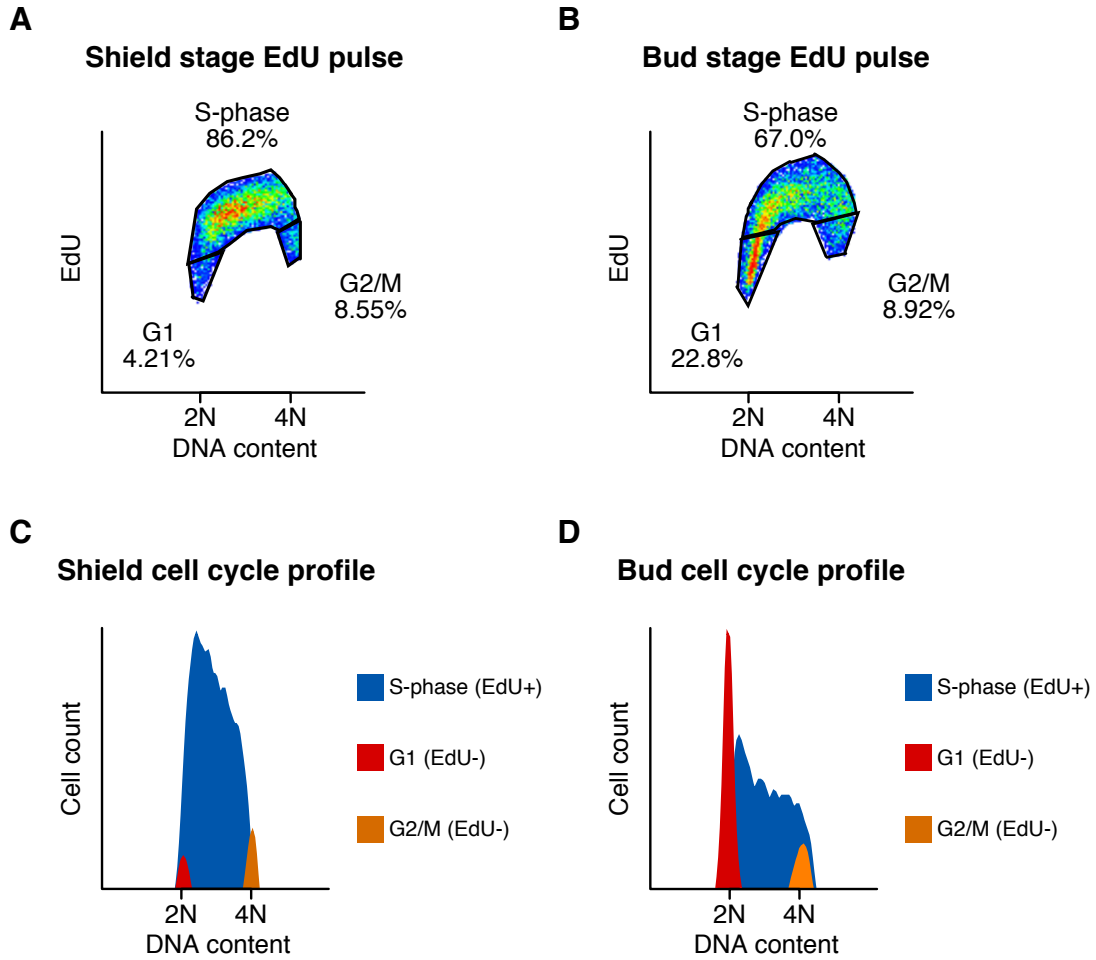

**Supplemental Fig S6.** Developmental Samples Enriched for S-phase cells, Related to Figure 5 (A-B) EDU+ and EDU- cells from pulsed (500uM, 10min) embryos plotted based against DNA content (Propidium Iodide (PI)) reveals that a high percentage of cells in early developmental stages are in S-phase (C-D) EDU+ and EDU- cells plotted based on cell count and DNA content (PI) shows the cell cycle profiles from embryos at the indicated stages
