# Supplementary material for: DNA replication timing during development anticipates transcriptional programs and parallels enhancer activation
Source: PubMed Central journal article supplement — Genome Res. 2017 Aug;27(8):1406–16. doi: 10.1101/gr.218602.116 (PMC5538556; doi:10.1101/gr.218602.116), 2017-08
Supplement: supp_gr.218602.116_Supplemental_Fig_S7.pdf [file supp_gr.218602.116_Supplemental_Fig_S7.pdf]

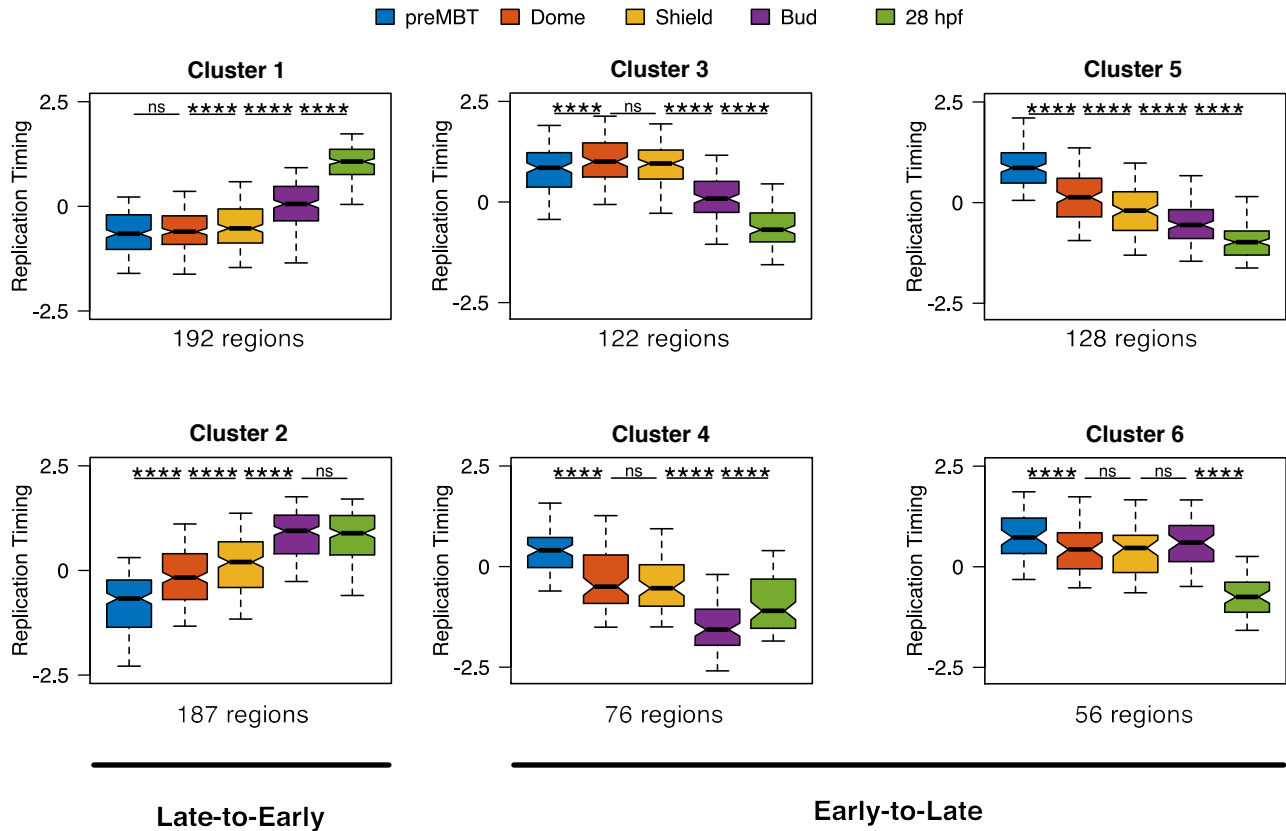

**Supplemental Fig S7.** Replication Timing for k-means Clusters of Changing Regions, Related to Figure 5  
 Box plots of the timing change clusters from k-means clustering of the changing regions defined by HMM (Figure 5C-D) shows the direction and timepoint of significant changes in timing between developmental timepoint. Box plots show the median (line), 95% confidence interval (notch), 25-75th percentile (box), and 10-90th percentile (whiskers). ANOVA with Bonferonni correction \*\*\*\* =  $p < 0.0001$
