# Supplementary material for: DNA replication timing during development anticipates transcriptional programs and parallels enhancer activation
Source: PubMed Central journal article supplement — Genome Res. 2017 Aug;27(8):1406–16. doi: 10.1101/gr.218602.116 (PMC5538556; doi:10.1101/gr.218602.116), 2017-08
Supplement: supp_gr.218602.116_Supplemental_Fig_S8.pdf [file supp_gr.218602.116_Supplemental_Fig_S8.pdf]

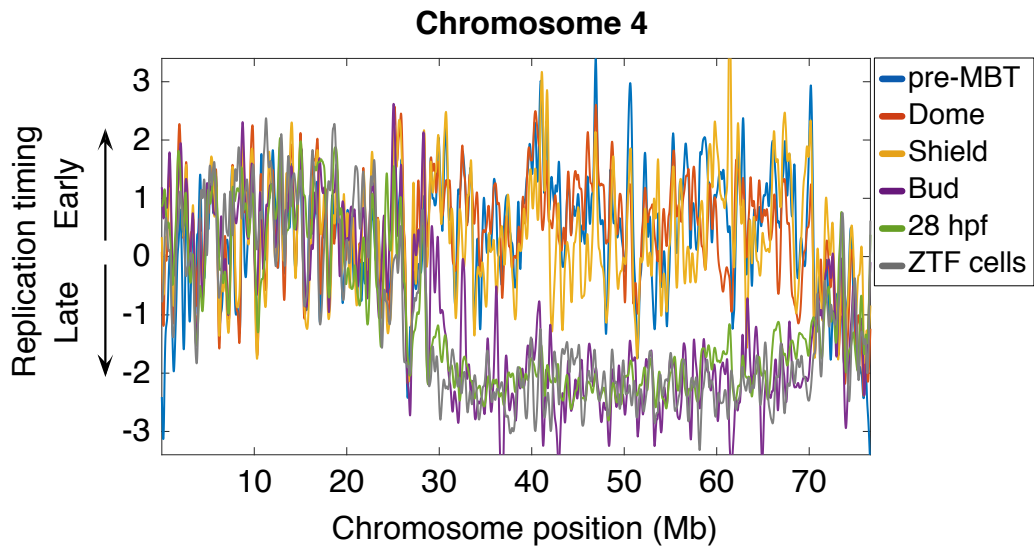

**Supplemental Fig S8.** Chromosome 4 Replication Timing Throughout Development, Related to Figure 7. Chromosome 4 replication timing plotted at all developmental stages assayed demonstrates that the long arm of Chromosome 4 is not late replicating prior to shield stage, and that it remains late replicating throughout development after the switch at the Bud stage
